# Supplementary material
Source: PubMed Central journal article supplement (PMC7735710)
Supplement: ic0c02696_si_001.pdf [file ic0c02696_si_001.pdf]

## SUPPORTING INFORMATION

Diradical Character of Neutral Heteroleptic Bis(1,2-dithiolene) Metal Complexes: Case Study of [Pd(Me<sub>2</sub>timdt)(mnt)] (Me<sub>2</sub>timdt = 1,3-Dimethyl-2,4,5-trithioimidazolidine; mnt<sup>2-</sup> = 1,2-Dicyano-1,2-ethylenedithiolate)

*M. Carla Aragoni,<sup>†</sup> Claudia Caltagirone,<sup>†</sup> Vito Lippolis,<sup>†</sup> Enrico Podda,<sup>†</sup> Alexandra M. Z. Slawin,<sup>‡</sup> J. Derek Woollins,<sup>§,‡</sup> Anna Pintus,<sup>\*†</sup> and Massimiliano Arca<sup>\*†</sup>*

<sup>†</sup> Dipartimento di Scienze Chimiche e Geologiche, Università degli Studi di Cagliari, S. S. 554  
bivio per Sestu, 09042 Monserrato (Cagliari), Italy

E-mail: marca@unica.it

<sup>‡</sup> EaStCHEM School of Chemistry, University of St. Andrews, North Haugh, St. Andrews, Fife,  
KY16 9ST, UK

<sup>§</sup> Department of Chemistry, Khalifa University, P.O. Box 127788, Abu Dhabi, United Arab  
Emirates

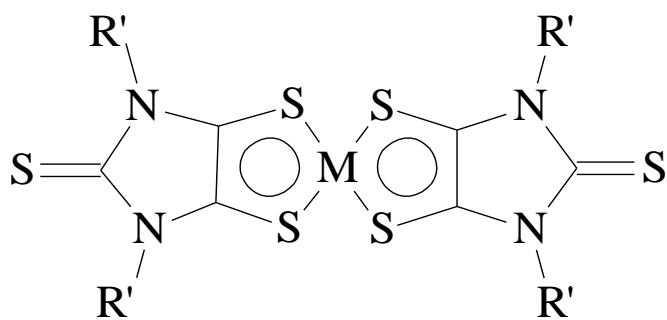

**Chart S1.** Molecular scheme of neutral  $[M(R'_2timdt)_2]$  bis(1,2-dithiolene) complexes.

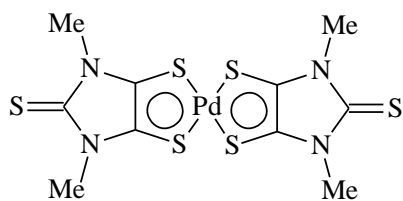

1

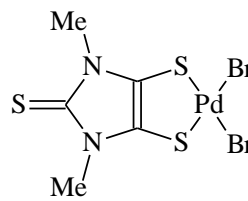

2

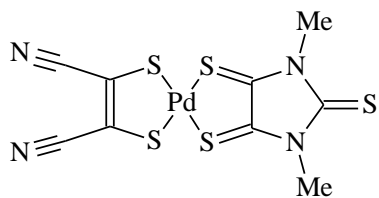

3

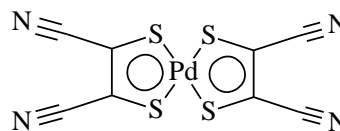

4

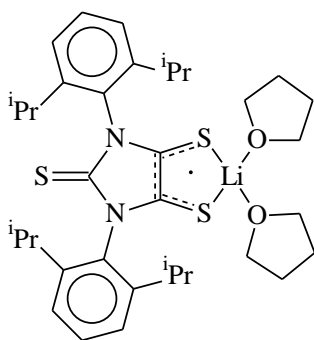

5

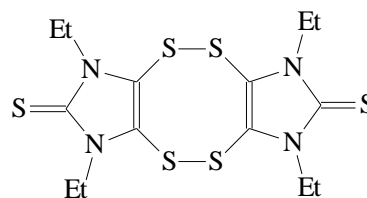

6

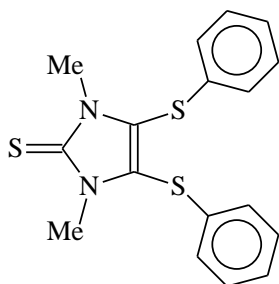

7

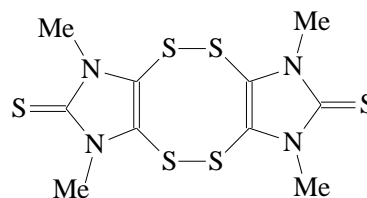

(Me<sub>2</sub>timdt)<sub>2</sub>

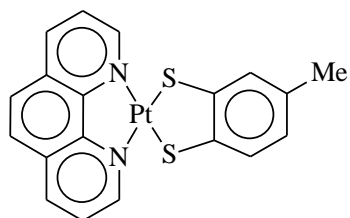

[Pt(phen)(tdt)]

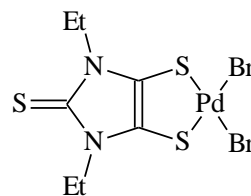

[Pd(Et<sub>2</sub>timdt)Br<sub>2</sub>]

**Chart S2.** Molecular scheme of compounds 1–7, (Me<sub>2</sub>timdt)<sub>2</sub>, [Pt(phen)(tdt)], and [Pd(Et<sub>2</sub>timdt)Br<sub>2</sub>]. Bis(1,2-dithiolene) Pd complexes 1–4 are represented in their neutral forms.

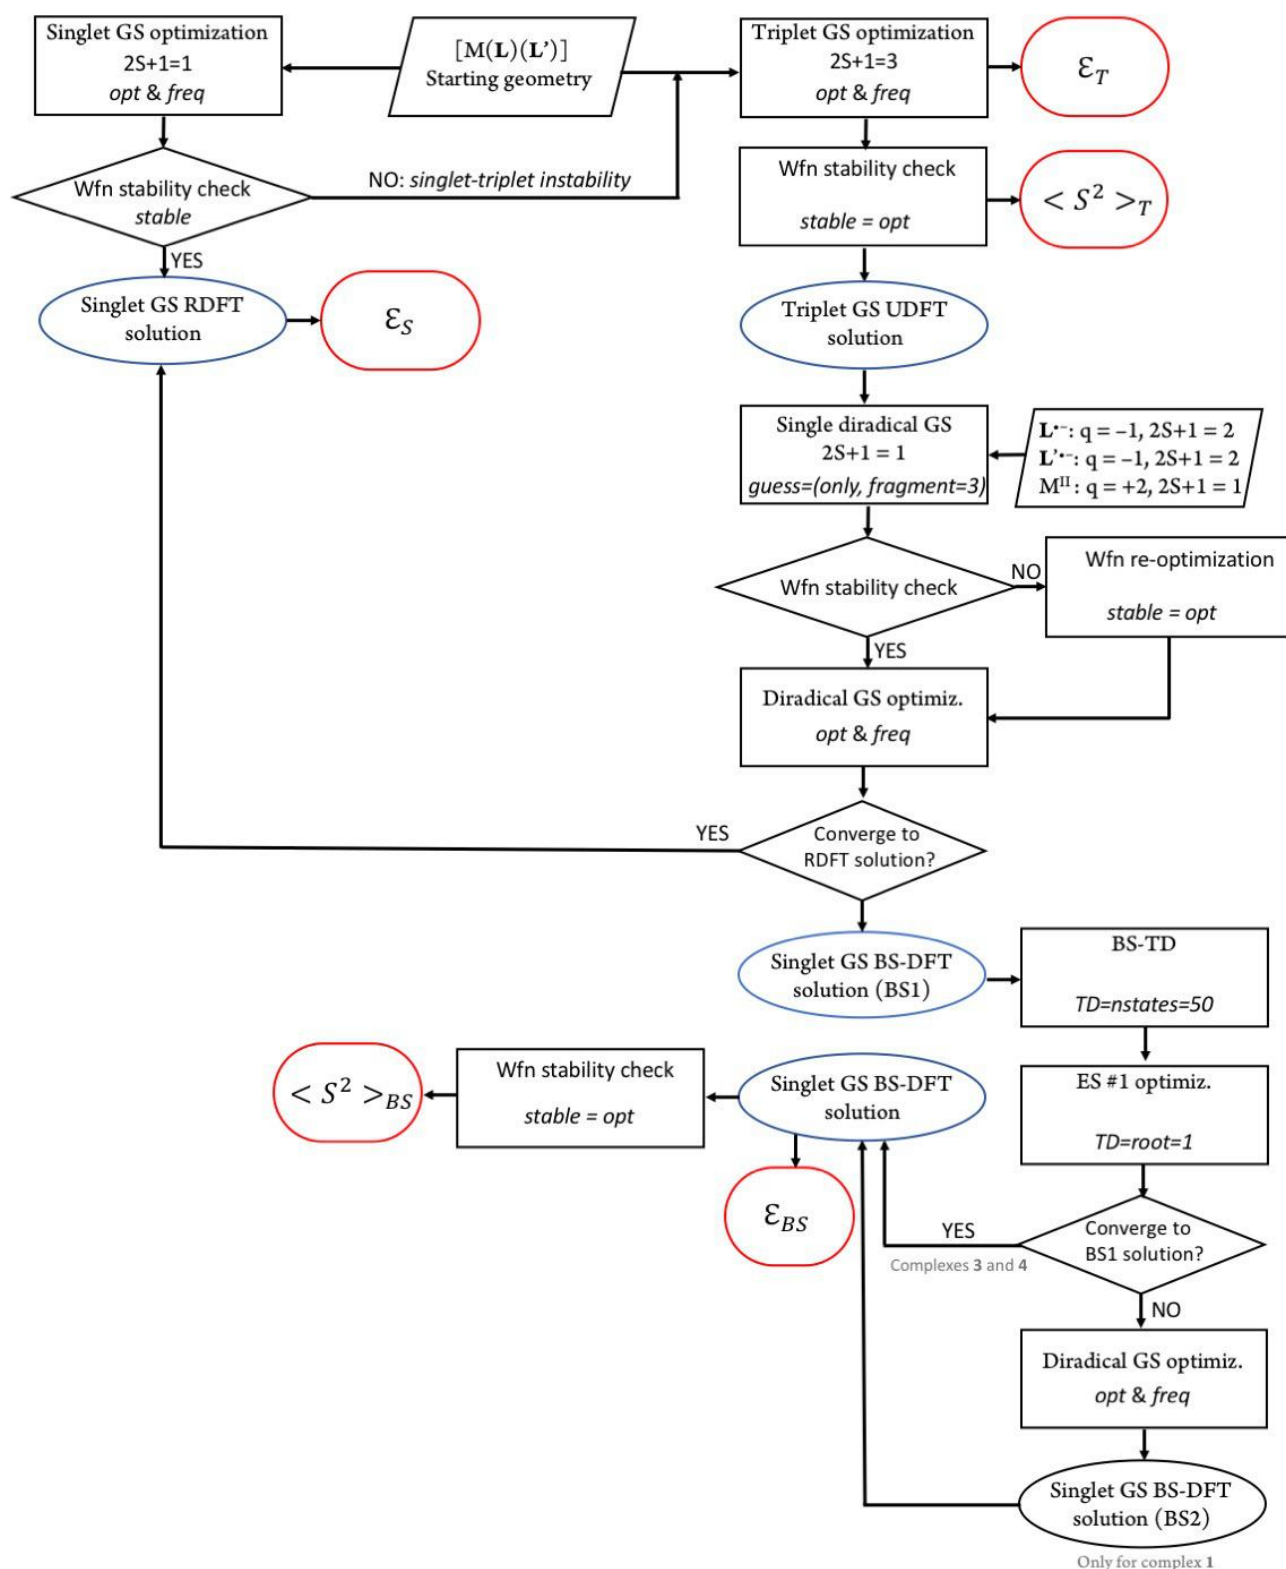

**Chart S3.** Flowchart representing the calculations for modeling neutral bis(1,2-dithiolene) metal complexes  $[M(L)(L')]$  ( $M = Ni, Pd$ ) in their triplet ground state, in the closed-shell singlet state, and as antiferromagnetically coupled singlet diradicals in a broken-symmetry (DFT-BS) approach. Each optimized geometry was verified by a vibrational frequency calculation, omitted in the flowchart for the sake of clarity.

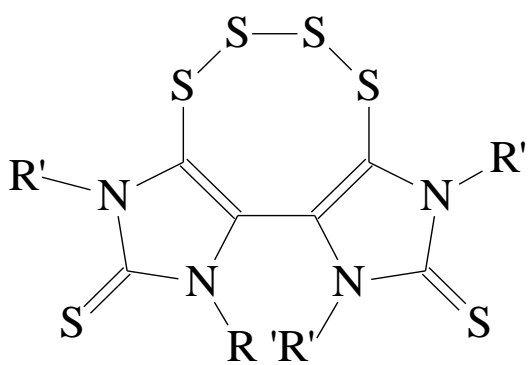

a

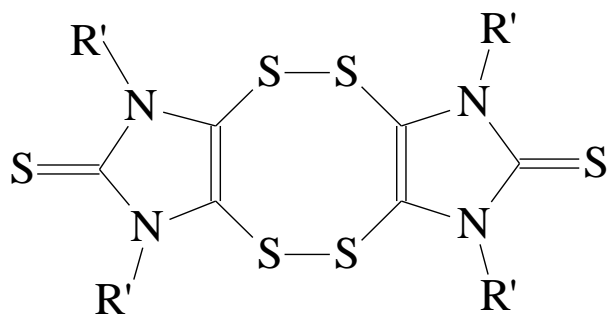

b

**Chart S4.** Molecular scheme of tetrasubstituted tetrathioincino derivatives obtained by sulfuration of the corresponding disubstituted imidazolidine-2-thione-4,5-dione.

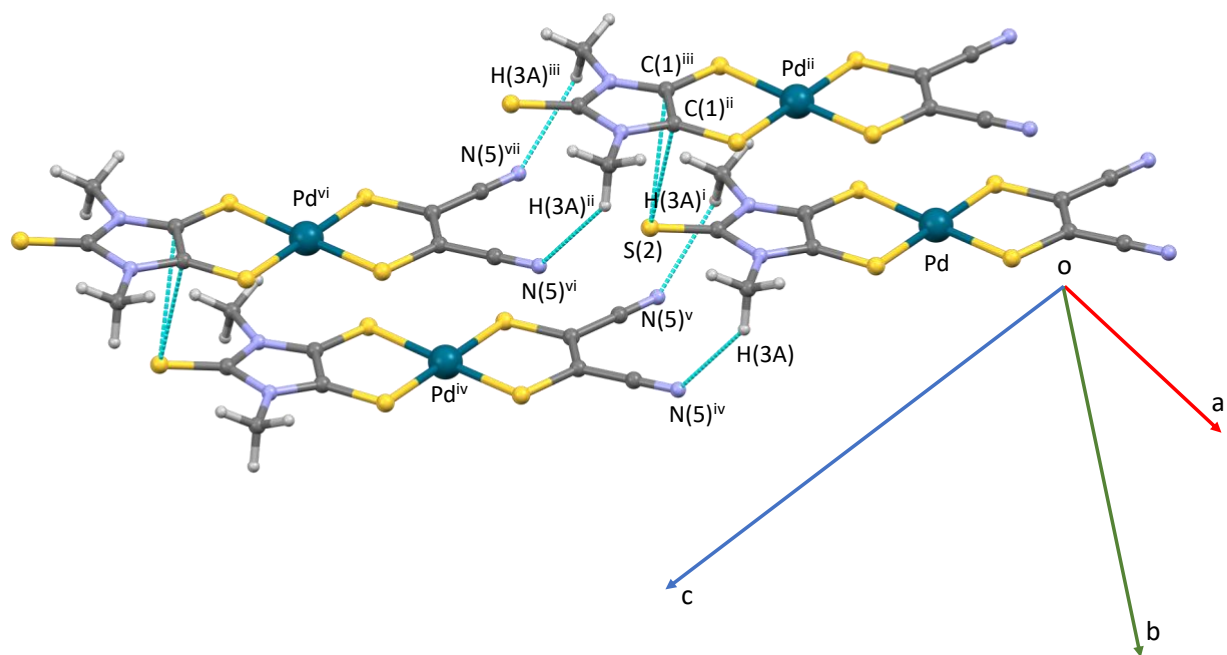

**Figure S1.** Intermolecular interactions responsible for the packing in compound **3**. Only the atoms involved in the interactions are labelled.  $S(2)–C(1)^{ii/iii}$  3.420,  $H(3A)⋯N(5)^{iv/v}$  2.644. Symmetry operations:  $i = x, \frac{1}{2}-y, z$ ;  $ii = -1+x, y, z$ ;  $iii = -1+x, \frac{1}{2}-y, z$ ;  $iv = -1+x, y, 1+z$ ;  $v = -1+x, \frac{1}{2}-y, 1+z$ ;  $vi = -2+x, y, 1+z$ ;  $vii = -2+x, \frac{1}{2}-y, 1+z$ .

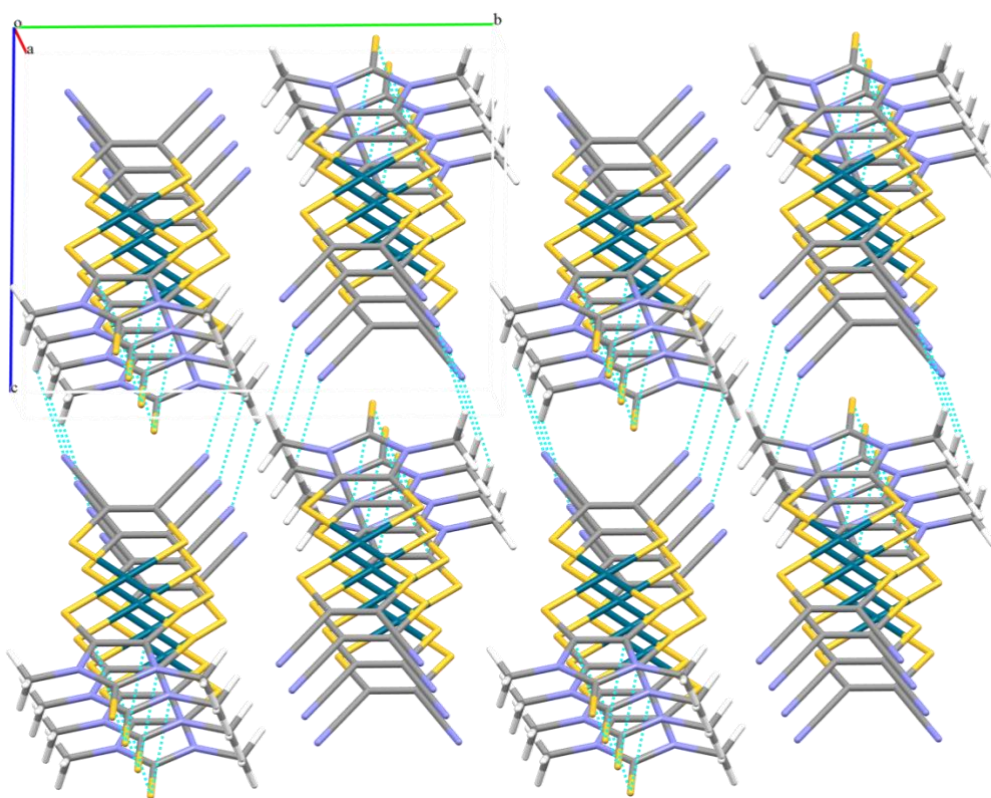

**Figure S2.** Parallel stacks of neutral molecules of **3** seen along the *a* vector.

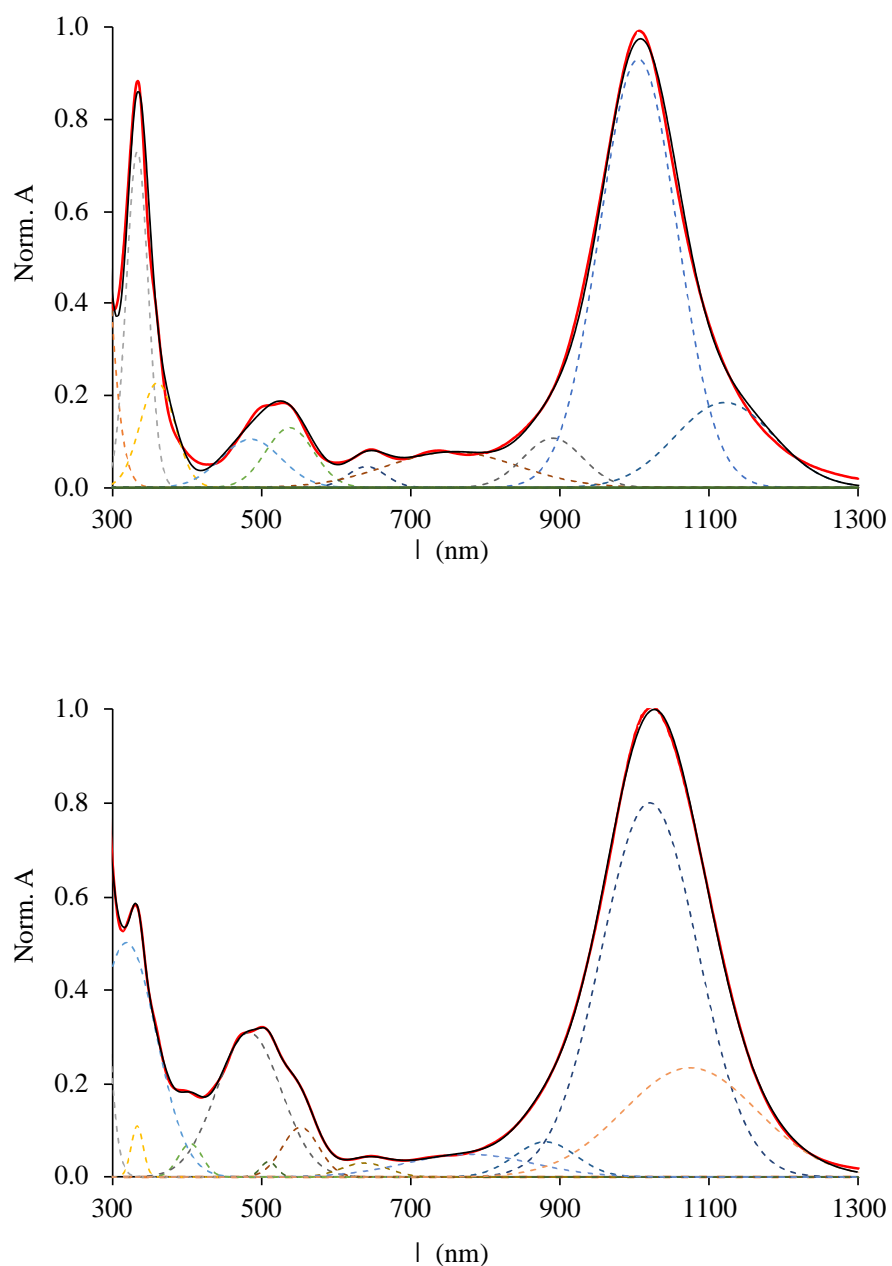

**Figure S3.** Experimental (red continuous line) normalized UV-vis-NIR absorption spectrum (300–1300 nm) of complex **1** (top) and complex **3** (bottom) in CH<sub>2</sub>Cl<sub>2</sub> solution decomposed into Gaussian peaks (dashed line). The spectrum simulated as the sum of the constituent components is reproduced as a black continuous line. Components of the NIR band in complex **1** (top):  $\lambda_1 = 1004.8$  nm,  $w_1 = 121.9$  nm, integral ratio 74.5%;  $\lambda_2 = 890.3$  nm,  $w_2 = 93.5$  nm, 6.6%;  $\lambda_3 = 1120.2$  nm,  $w_3 = 155.42$  nm, 18.9%. Components of the NIR band in complex **3** (bottom):  $\lambda_1 = 1020.0$  nm,  $w = 152.3$  nm, 68.3% and  $\lambda_2 = 1074.2$  nm,  $w_2 = 211.6$  nm, 27.6%;  $\lambda_3 = 880.3$  nm,  $w_3 = 96.4$  nm, 4.1%.



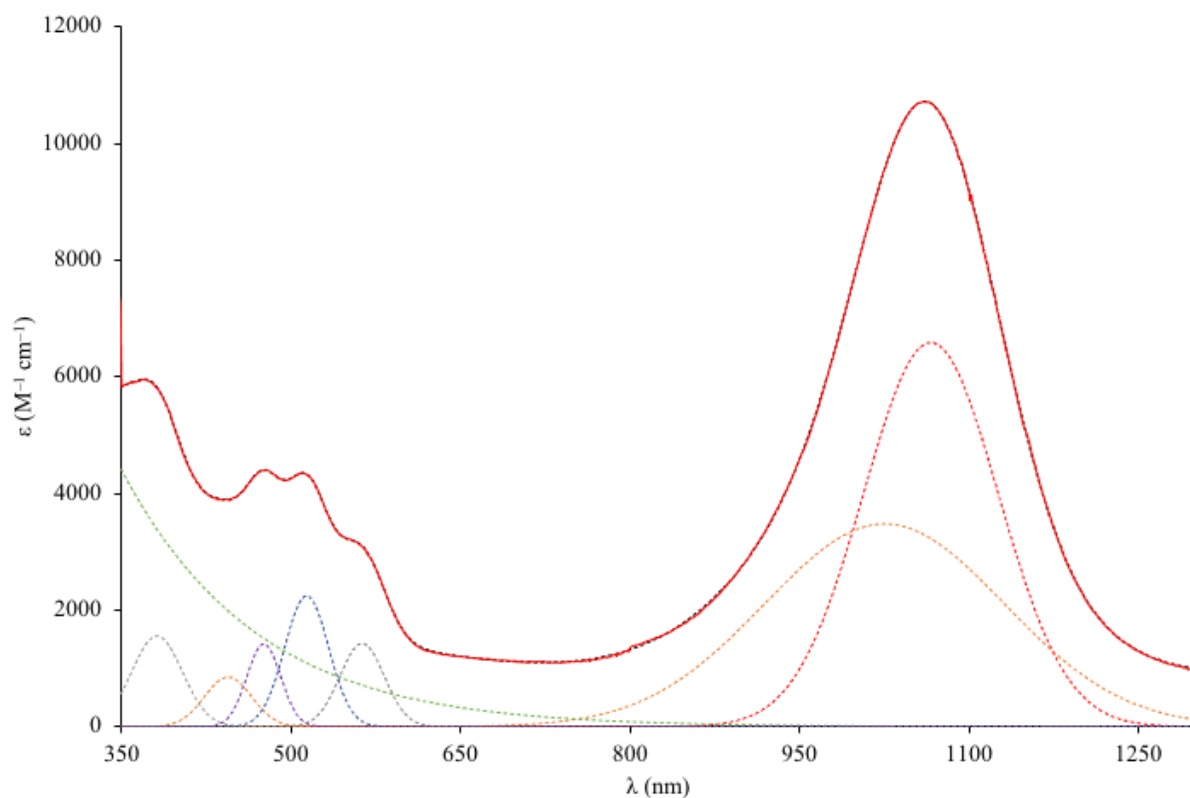

**Figure S4.** Experimental (red continuous line) UV–vis–NIR absorption spectrum (350–1300 nm) of complex **3** in  $\text{CHCl}_3$  solution decomposed into Gaussian peaks (dashed line). A broad baseline peak is not depicted. The spectrum simulated as the sum of the constituent components is reproduced as a black continuous line. Components of the NIR band:  $\lambda_1 = 1066.2$  nm,  $w_1 = 140.6$  nm, 51.6%,  $\lambda_2 = 1025.1$  nm,  $w_2 = 249.5$  nm, 48.4%.

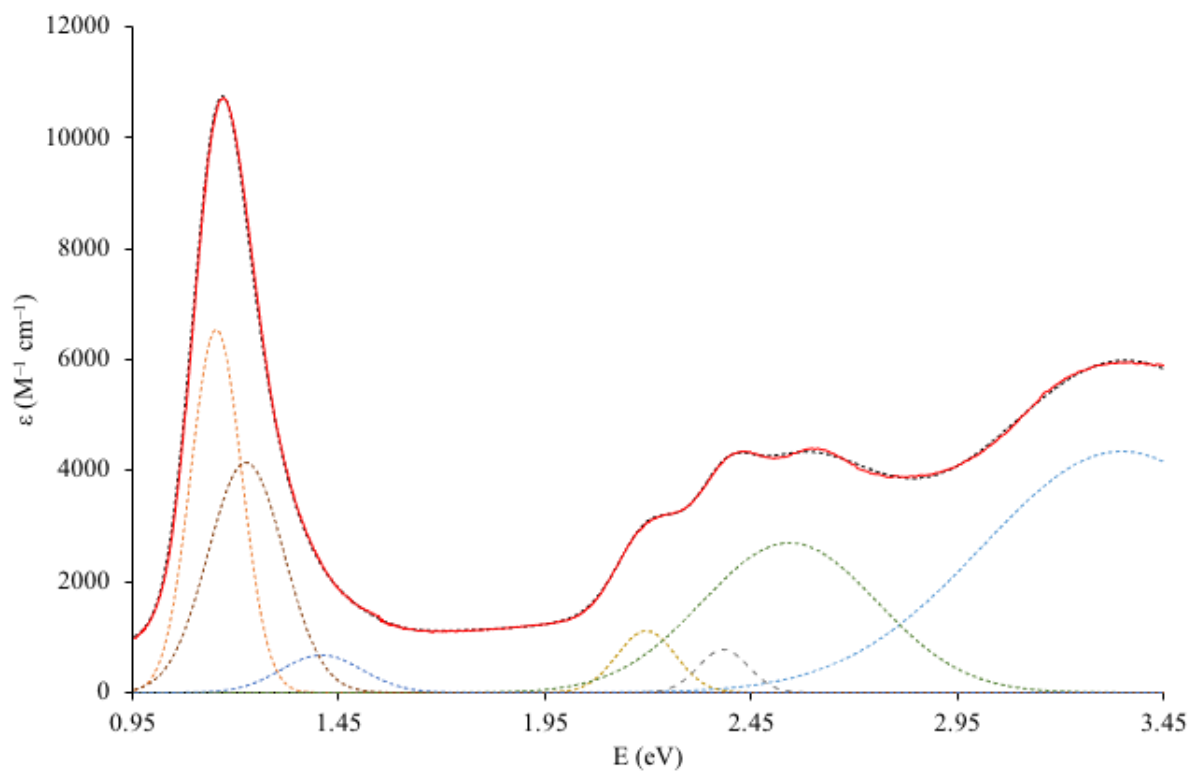

**Figure S5.** Experimental (red continuous line) UV-vis-NIR absorption spectrum (energy scale 0.95–3.45 eV) of complex **3** in  $\text{CHCl}_3$  solution decomposed into Gaussian peaks (dashed line). The broad peak mimicking the baseline is not depicted. The spectrum simulated as the sum of the constituent components is reproduced as a black continuous line. Components of the NIR band:  $E_1 = 1.115$  eV,  $w_1 = 0.145$  eV, 47.4%,  $E_2 = 1.227$  eV,  $w_2 = 0.216$  eV, 44.6%;  $E_3 = 1.410$  eV,  $w_3 = 0.232$  eV, 8.0%.

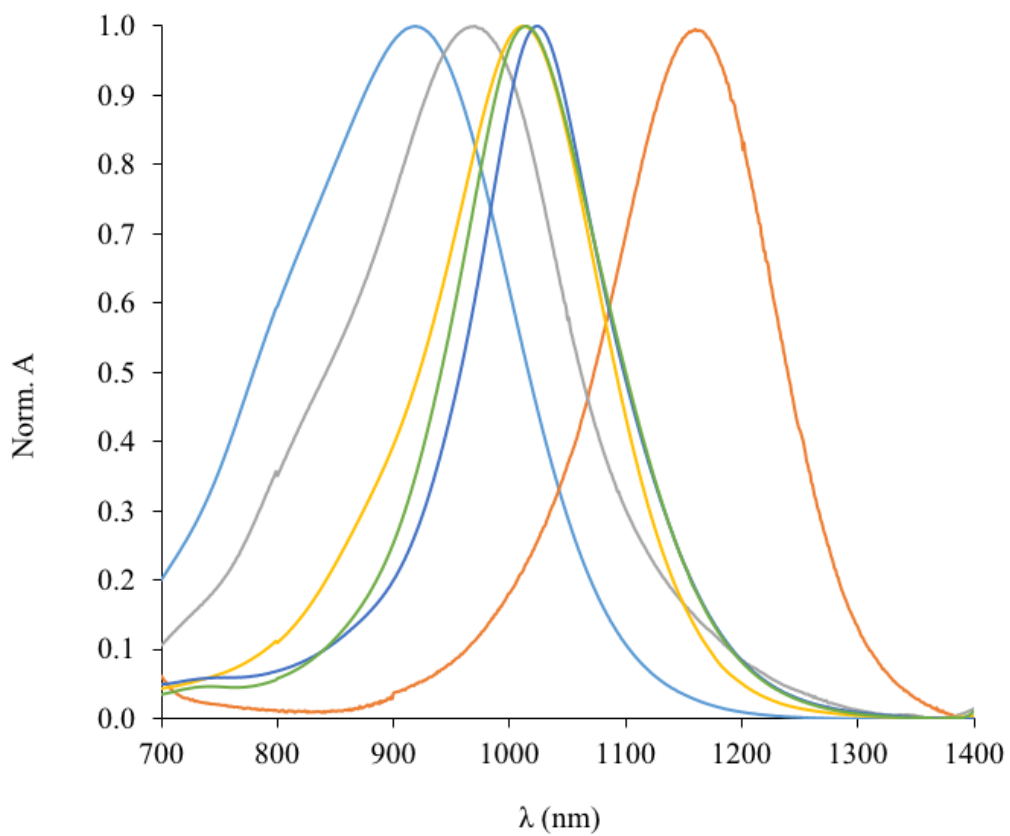

**Figure S6.** Normalized vis-NIR spectrum (700–1400 nm) recorded for complex **3** in MeCN (cyan), DMF (grey), THF (yellow), CH<sub>2</sub>Cl<sub>2</sub> (green), and CHCl<sub>3</sub> (orange).

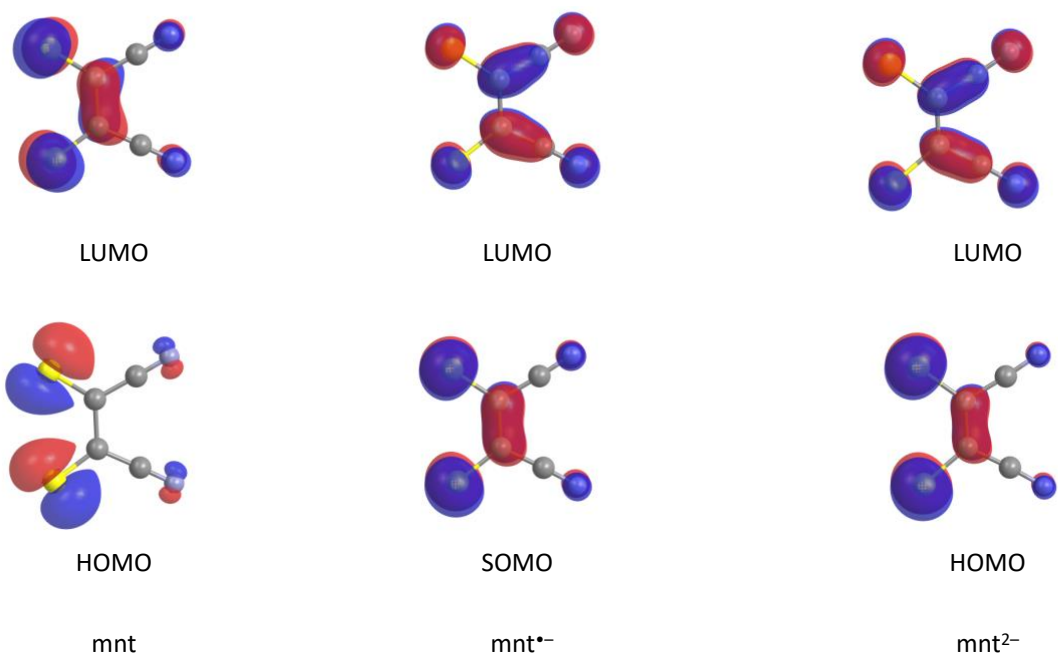

**Figure S7.** Frontier MO isosurfaces calculated for the free ligand  $\text{mnt}^{q-}$  ( $q = 0, 1, 2$ ). Cutoff value = 0.05 |e|.

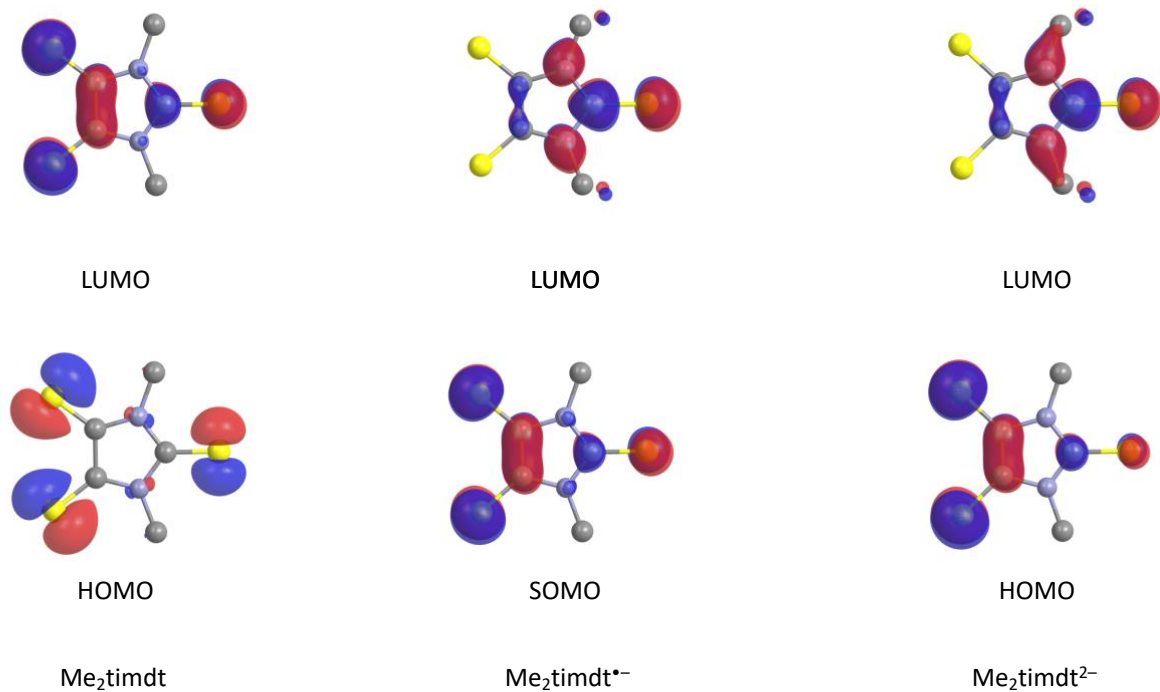

**Figure S8.** Frontier MO isosurfaces calculated for the free ligand Me<sub>2</sub>timdt<sup>q-</sup> ( $q = 0, 1, 2$ ). Hydrogen atoms have been omitted for clarity. Cutoff value = 0.05 |e|.

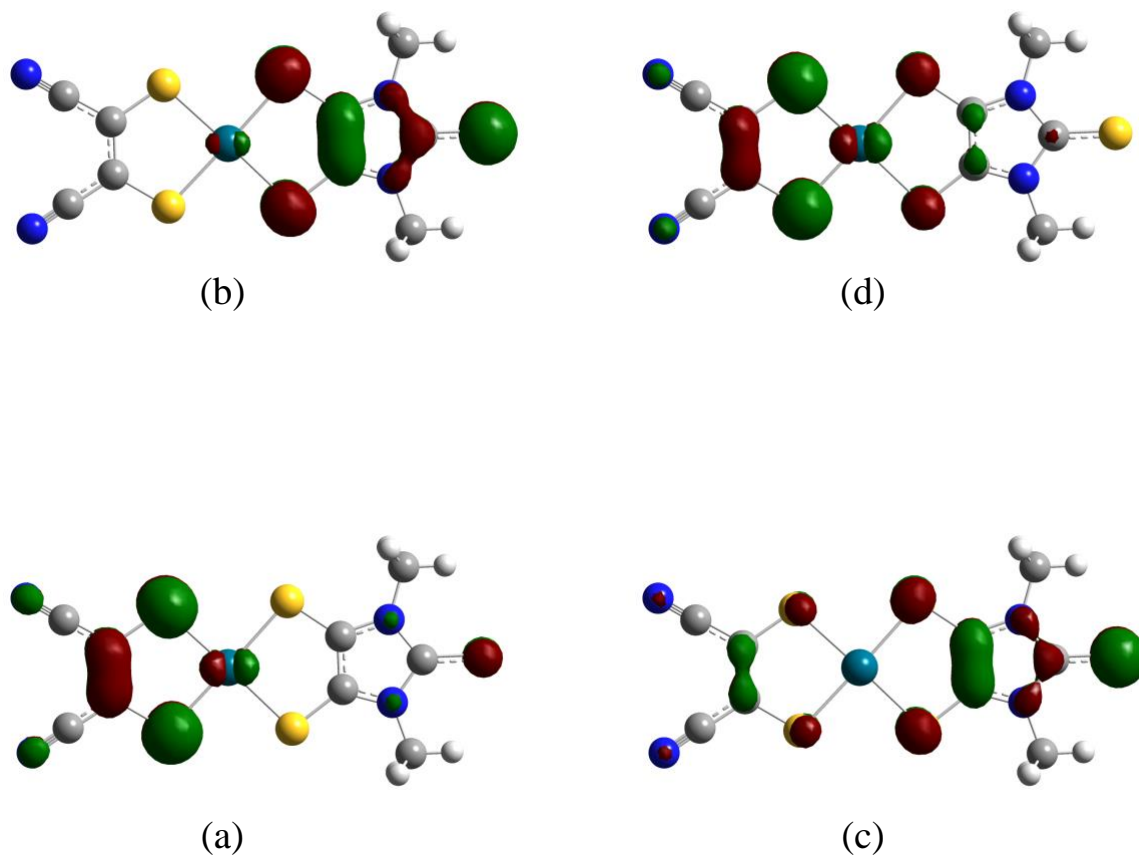

**Figure S9.** Frontier MOs [ $\alpha$ -HOMO (a),  $\alpha$ -LUMO (b),  $\beta$ -HOMO (c), and  $\beta$ -LUMO(d)] calculated for complex **3** at DFT-BS level. Cutoff value = 0.05 |e|.

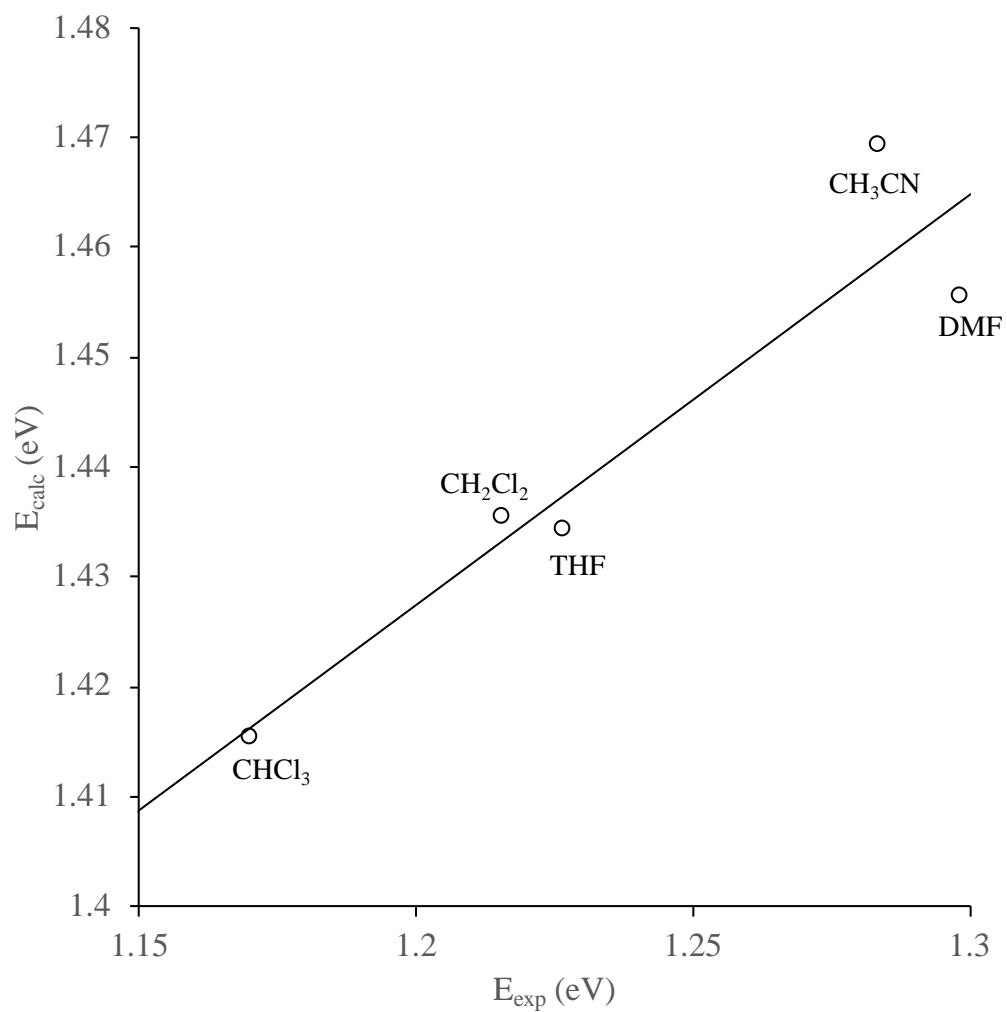

**Figure S10.** Correlation between NIR-transition energies  $E_{\text{exp}}$  and the corresponding values  $E_{\text{calc}}$  calculated for complex **3** at TD-RDFT IEF-PCM level for selected solvents.

**Table S1.** Crystal data and structure refinement for complex **3**.

|                                        |                                                                                                                                     |
|----------------------------------------|-------------------------------------------------------------------------------------------------------------------------------------|
| Empirical formula                      | C <sub>9</sub> H <sub>6</sub> N <sub>4</sub> PdS <sub>5</sub>                                                                       |
| Formula weight                         | 436.88                                                                                                                              |
| Temperature                            | 93(2) K                                                                                                                             |
| Wavelength                             | 0.71073 Å                                                                                                                           |
| Crystal system                         | Monoclinic                                                                                                                          |
| Space group                            | P2(1)/m                                                                                                                             |
| Unit cell dimensions                   | $a = 4.924(2)$ Å $\alpha = 90^\circ$ .<br>$b = 13.674(6)$ Å $\beta = 93.132(13)^\circ$ .<br>$c = 10.574(4)$ Å $\gamma = 90^\circ$ . |
| Volume                                 | 710.9(5) Å <sup>3</sup>                                                                                                             |
| Z                                      | 2                                                                                                                                   |
| Density (calculated)                   | 2.041 Mg/m <sup>3</sup>                                                                                                             |
| Absorption coefficient                 | 2.027 mm <sup>-1</sup>                                                                                                              |
| F(000)                                 | 428                                                                                                                                 |
| Crystal size                           | 0.10 x 0.02 x 0.02 mm <sup>3</sup>                                                                                                  |
| $\theta$ range for data collection     | 1.93 to 25.33°.                                                                                                                     |
| Index ranges                           | $-5 \leq h \leq 4$ , $-16 \leq k \leq 16$ , $-12 \leq l \leq 12$                                                                    |
| Reflections collected                  | 4608                                                                                                                                |
| Independent reflections                | 1350 [R(int) = 0.0742]                                                                                                              |
| Completeness to $\theta = 25.00^\circ$ | 99.7%                                                                                                                               |
| Absorption correction                  | Multiscan                                                                                                                           |
| Max. and min. transmission             | 1.0000 and 0.8420                                                                                                                   |
| Refinement method                      | Full-matrix least-squares on F <sup>2</sup>                                                                                         |
| Data / restraints / parameters         | 1350 / 0 / 93                                                                                                                       |
| Goodness-of-fit on F <sup>2</sup>      | 1.083                                                                                                                               |
| Final R indices [I > 2sigma(I)]        | R1 = 0.0634, wR2 = 0.1306                                                                                                           |
| R indices (all data)                   | R1 = 0.0938, wR2 = 0.1466                                                                                                           |
| Largest diff. peak and hole            | 0.915 and -1.029 e·Å <sup>-3</sup>                                                                                                  |



**Table S2.** Atomic coordinates ( $\times 10^4$ ) and equivalent isotropic displacement parameters ( $\text{\AA}^2 \times 10^3$ ) for complex **3**.  $U(\text{eq})$  is defined as one third of the trace of the orthogonalized  $U_{ij}$  tensor.

|        | x          | y        | z         | U (eq) |
|--------|------------|----------|-----------|--------|
| Pd (1) | 7521 (2)   | 2500     | 5280 (1)  | 32 (1) |
| S (1)  | 5404 (4)   | 3712 (2) | 6392 (2)  | 34 (1) |
| C (1)  | 3614 (15)  | 3032 (6) | 7345 (6)  | 29 (2) |
| N (1)  | 1829 (12)  | 3304 (5) | 8192 (6)  | 29 (2) |
| S (2)  | -1715 (6)  | 2500     | 9760 (3)  | 42 (1) |
| C (2)  | 590 (20)   | 2500     | 8748 (11) | 36 (3) |
| C (3)  | 1234 (17)  | 4314 (6) | 8507 (8)  | 41 (2) |
| S (4)  | 9560 (4)   | 3674 (2) | 4167 (2)  | 35 (1) |
| C (4)  | 11337 (15) | 2999 (6) | 3110 (6)  | 32 (2) |
| C (5)  | 12807 (17) | 3535 (6) | 2219 (8)  | 34 (2) |
| N (5)  | 13971 (15) | 3969 (6) | 1505 (7)  | 43 (2) |

**Table S3.** Bond lengths [Å] and angles [°] for complex **3**.

---

|                                            |           |
|--------------------------------------------|-----------|
| Pd(1)–S(4) <sup>i</sup>                    | 2.258(2)  |
| Pd(1)–S(4)                                 | 2.258(2)  |
| Pd(1)–S(1) <sup>i</sup>                    | 2.314(2)  |
| Pd(1)–S(1)                                 | 2.314(2)  |
| S(1)–C(1)                                  | 1.660(8)  |
| C(1)–N(1)                                  | 1.342(9)  |
| C(1)–C(1) <sup>i</sup>                     | 1.454(16) |
| N(1)–C(2)                                  | 1.401(10) |
| N(1)–C(3)                                  | 1.454(10) |
| S(2)–C(2)                                  | 1.603(13) |
| C(2)–N(1) <sup>i</sup>                     | 1.401(9)  |
| C(3)–H(3A)                                 | 0.9800    |
| C(3)–H(3B)                                 | 0.9800    |
| C(3)–H(3C)                                 | 0.9800    |
| S(4)–C(4)                                  | 1.724(8)  |
| C(4)–C(4) <sup>i</sup>                     | 1.364(16) |
| C(4)–C(5)                                  | 1.423(11) |
| C(5)–N(5)                                  | 1.139(10) |
|                                            |           |
| S(4) <sup>i</sup> –Pd(1)–S(4)              | 90.61(12) |
| S(4) <sup>i</sup> –Pd(1)–S(1) <sup>i</sup> | 88.93(8)  |
| S(4)–Pd(1)–S(1) <sup>i</sup>               | 179.15(8) |
| S(4) <sup>i</sup> –Pd(1)–S(1)              | 179.15(8) |
| S(4)–Pd(1)–S(1)                            | 88.92(8)  |
| S(1) <sup>i</sup> –Pd(1)–S(1)              | 91.53(12) |
| C(1)–S(1)–Pd(1)                            | 100.1(3)  |
| N(1)–C(1)–C(1) <sup>i</sup>                | 106.1(5)  |
| N(1)–C(1)–S(1)                             | 129.7(6)  |
| C(1) <sup>i</sup> –C(1)–S(1)               | 124.1(3)  |
| C(1)–N(1)–C(2)                             | 112.2(7)  |
| C(1)–N(1)–C(3)                             | 124.4(7)  |
| C(2)–N(1)–C(3)                             | 123.5(7)  |
| N(1)–C(2)–N(1) <sup>i</sup>                | 103.4(10) |
| N(1)–C(2)–S(2)                             | 128.3(5)  |
| N(1) <sup>i</sup> –C(2)–S(2)               | 128.3(5)  |
| N(1)–C(3)–H(3A)                            | 109.5     |
| N(1)–C(3)–H(3B)                            | 109.5     |
| H(3A)–C(3)–H(3B)                           | 109.5     |
| N(1)–C(3)–H(3C)                            | 109.5     |
| H(3A)–C(3)–H(3C)                           | 109.5     |
| H(3B)–C(3)–H(3C)                           | 109.5     |
| C(4)–S(4)–Pd(1)                            | 102.3(3)  |
| C(4) <sup>i</sup> –C(4)–C(5)               | 121.0(5)  |
| C(4) <sup>i</sup> –C(4)–S(4)               | 122.4(3)  |
| C(5)–C(4)–S(4)                             | 116.6(6)  |
| N(5)–C(5)–C(4)                             | 179.5(10) |

---

Symmetry transformations used to generate equivalent atoms: <sup>i</sup> = x, -y+1/2, z.

**Table S4.** Anisotropic displacement parameters ( $\text{\AA}^2 \times 10^3$ ) for complex **3**. The anisotropic displacement factor exponent takes the form:  $-2\pi^2[ h^2 a^{*2}U^{11} + \dots + 2 h k a^* b^* U^{12} ]$

|        | $U^{11}$ | $U^{22}$ | $U^{33}$ | $U^{23}$ | $U^{13}$ | $U^{12}$ |
|--------|----------|----------|----------|----------|----------|----------|
| Pd (1) | 34 (1)   | 35 (1)   | 29 (1)   | 0        | 5 (1)    | 0        |
| S (1)  | 36 (1)   | 34 (1)   | 32 (1)   | -2 (1)   | 7 (1)    | -2 (1)   |
| C (1)  | 29 (4)   | 39 (5)   | 19 (4)   | -4 (3)   | 4 (3)    | 2 (4)    |
| N (1)  | 27 (3)   | 29 (4)   | 31 (3)   | 3 (3)    | 4 (3)    | -1 (3)   |
| S (2)  | 37 (2)   | 52 (2)   | 37 (2)   | 0        | 10 (1)   | 0        |
| C (2)  | 30 (6)   | 35 (8)   | 43 (7)   | 0        | -3 (5)   | 0        |
| C (3)  | 39 (5)   | 45 (6)   | 39 (5)   | -1 (4)   | 10 (4)   | 9 (4)    |
| S (4)  | 40 (1)   | 34 (1)   | 31 (1)   | -1 (1)   | 9 (1)    | -1 (1)   |
| C (4)  | 22 (4)   | 49 (5)   | 25 (4)   | 2 (3)    | 9 (3)    | -8 (4)   |
| C (5)  | 34 (5)   | 27 (5)   | 42 (5)   | -4 (4)   | 6 (4)    | -2 (4)   |
| N (5)  | 43 (4)   | 39 (5)   | 48 (4)   | 0 (4)    | 16 (4)   | -2 (4)   |

**Table S5.** Hydrogen coordinates ( $\times 10^4$ ) and isotropic displacement parameters ( $\text{\AA}^2 \times 10^3$ ) for complex **3**.

|        | x    | y    | z    | U (eq) |
|--------|------|------|------|--------|
| H (3A) | 2544 | 4541 | 9174 | 61     |
| H (3B) | -610 | 4357 | 8807 | 61     |
| H (3C) | 1368 | 4724 | 7753 | 61     |

**Table S6.** Torsion angles [°] for complex **3**.

---

|                                          |            |
|------------------------------------------|------------|
| S (4) <sup>i</sup> -Pd (1) -S (1) -C (1) | 123 (6)    |
| S (4) -Pd (1) -S (1) -C (1)              | 179.6 (2)  |
| S (1) <sup>i</sup> -Pd (1) -S (1) -C (1) | 0.3 (3)    |
| Pd (1) -S (1) -C (1) -N (1)              | -176.4 (6) |
| Pd (1) -S (1) -C (1) -C (1) <sup>i</sup> | -0.2 (2)   |
| C (1) <sup>i</sup> -C (1) -N (1) -C (2)  | -1.0 (6)   |
| S (1) -C (1) -N (1) -C (2)               | 175.7 (6)  |
| C (1) <sup>i</sup> -C (1) -N (1) -C (3)  | 178.9 (5)  |
| S (1) -C (1) -N (1) -C (3)               | -4.5 (10)  |
| C (1) -N (1) -C (2) -N (1) <sup>i</sup>  | 1.5 (10)   |
| C (3) -N (1) -C (2) -N (1) <sup>i</sup>  | -178.3 (5) |
| C (1) -N (1) -C (2) -S (2)               | -177.6 (7) |
| C (3) -N (1) -C (2) -S (2)               | 2.5 (12)   |
| S (4) <sup>i</sup> -Pd (1) -S (4) -C (4) | 2.0 (3)    |
| S (1) <sup>i</sup> -Pd (1) -S (4) -C (4) | -55 (6)    |
| S (1) -Pd (1) -S (4) -C (4)              | -177.3 (2) |
| Pd (1) -S (4) -C (4) -C (4) <sup>i</sup> | -1.6 (2)   |
| Pd (1) -S (4) -C (4) -C (5)              | 177.9 (5)  |
| C (4) <sup>i</sup> -C (4) -C (5) -N (5)  | 147 (100)  |
| S (4) -C (4) -C (5) -N (5)               | -33 (100)  |

---

Symmetry transformations used to generate equivalent atoms: <sup>i</sup> = x, -y+1/2, z.

**Table S7.** Mulliken contribution (%) of the central metal ion and the mnt and Me<sub>2</sub>timdt ligands to the frontier KS-MOs calculated at DFT level for complex **3** (CS GS configuration) in the gas phase and in selected solvents.<sup>a</sup>

|                                 |                                 | Pd  | mnt | Me <sub>2</sub> timdt |
|---------------------------------|---------------------------------|-----|-----|-----------------------|
| HOMO (93)                       | Gas                             | 8   | 61  | 31                    |
|                                 | CHCl <sub>3</sub>               | 9   | 68  | 23                    |
|                                 | CH <sub>2</sub> Cl <sub>2</sub> | 10  | 69  | 21                    |
|                                 | THF                             | 10  | 69  | 21                    |
|                                 | CH <sub>3</sub> CN              | 10  | 70  | 20                    |
|                                 | DMF                             | 10  | 70  | 20                    |
|                                 | LUMO (94)                       | Gas | 6   | 24                    |
| CHCl <sub>3</sub>               |                                 | 6   | 16  | 78                    |
| CH <sub>2</sub> Cl <sub>2</sub> |                                 | 6   | 14  | 80                    |
| THF                             |                                 | 6   | 15  | 80                    |
| CH <sub>3</sub> CN              |                                 | 5   | 13  | 82                    |
| DMF                             |                                 | 5   | 13  | 82                    |

<sup>a</sup> IEF-PCM solvation model.

**Table S8.** Mulliken contribution (%) of the central metal ion and the mnt and Me<sub>2</sub>timdt ligands to the frontier KS-MOs calculated at DFT level for complex **3** in the CS and BS description of the GS in the gas phase.

| GS         | KS-MO        | Pd | mnt | Me <sub>2</sub> timdt |
|------------|--------------|----|-----|-----------------------|
| CS Singlet | HOMO (93)    | 8  | 61  | 31                    |
|            | LUMO (94)    | 6  | 24  | 70                    |
| BS         | $\alpha$ -93 | 9  | 76  | 14                    |
|            | $\beta$ -93  | 6  | 32  | 63                    |
|            | $\alpha$ -94 | 4  | 5   | 91                    |
|            | $\beta$ -94  | 10 | 54  | 36                    |

**Table S9.** Transition energy  $E$  ( $\text{cm}^{-1}$  and eV), wavelength  $\lambda$  (nm), oscillator strength  $f$ , and one-electron excitation contributions to the NIR transition calculated in the gas phase and at IEF-PCM RDFT level in selected solvents for complex **3**.<sup>a</sup>

|                          | $E$ ( $\text{cm}^{-1}$ ) | $E$ (eV) | $\lambda$ (nm) | $f$   |
|--------------------------|--------------------------|----------|----------------|-------|
| gas                      | 12010                    | 1.489    | 832.6          | 0.315 |
| $\text{CHCl}_3$          | 11416                    | 1.416    | 876.0          | 0.385 |
| $\text{CH}_2\text{Cl}_2$ | 11577                    | 1.436    | 863.8          | 0.368 |
| THF                      | 11568                    | 1.435    | 864.4          | 0.368 |
| $\text{CH}_3\text{CN}$   | 11850                    | 1.469    | 843.9          | 0.340 |
| DMF                      | 11739                    | 1.456    | 851.8          | 0.356 |

<sup>a</sup> IEF-PCM solvation model.



**Table S10.**  $\beta$  components (a.u.),  $\beta_{\text{tot}}$  values (a.u. and esu) and dipole moments  $\mu$  (a.u. and D) calculated for complex **3** in the gas phase, in CH<sub>2</sub>Cl<sub>2</sub> and CHCl<sub>3</sub>.

|                                           | Gas (CS) | Gas (BS) | CH <sub>2</sub> Cl <sub>2</sub> <sup>a</sup> | CHCl <sub>3</sub> <sup>a</sup> |
|-------------------------------------------|----------|----------|----------------------------------------------|--------------------------------|
| $\beta_{xxx}$                             | 0.00     | 0.00     | 0.00                                         | 0.00                           |
| $\beta_{xxy}$                             | 0.00     | 0.00     | 0.00                                         | 0.00                           |
| $\beta_{yyx}$                             | 0.00     | 0.00     | 0.00                                         | 0.00                           |
| $\beta_{yyy}$                             | 0.00     | 0.00     | 0.00                                         | 0.00                           |
| $\beta_{xxz}$                             | 52.44    | 57.28    | 102.50                                       | 73.96                          |
| $\beta_{yxz}$                             | 0.00     | 0.00     | 0.00                                         | 0.00                           |
| $\beta_{yyz}$                             | -0.18    | -290.02  | -76.78                                       | -44.49                         |
| $\beta_{zzx}$                             | 0.00     | 0.00     | 0.00                                         | 0.00                           |
| $\beta_{zyz}$                             | 0.00     | 0.00     | 0.00                                         | 0.00                           |
| $\beta_{zzz}$                             | 4301.37  | 20763.10 | 55019.10                                     | 38215.00                       |
| $\beta_{\text{tot}}$ (a.u.)               | 4353.63  | 20530.37 | 55044.82                                     | 38244.47                       |
| $\beta_{\text{tot}} \cdot 10^{-30}$ (esu) | 37.62    | 177.40   | 475.64                                       | 330.47                         |
| $\mu$ (a.u.)                              | 4.99     | 4.46     | 8.02                                         | 7.45                           |
| $\mu$ (Debye)                             | 11.44    | 11.33    | 20.39                                        | 18.94                          |

<sup>a</sup> IEF-PCM solvation model.
